# Supplementary material
Source: PubMed Central journal article supplement (PMC3948794)
Supplement: 4e670099f1ab0e1441eb10e9187d9aa7_genetics.113.160846-4.pdf [file 4e670099f1ab0e1441eb10e9187d9aa7_genetics.113.160846-4.pdf]

**Table S2 List of primers used for this study**

| N° | name                 | sequence                                             |
|----|----------------------|------------------------------------------------------|
| 1  | acc65i gfpf          | aacggtaccagaaaaaatgagtaaaggagaag                     |
| 2  | acc65i gfpr          | ttgggtacctttgtatagttcatccatgcc                       |
| 3  | h1bmchlet868f        | cccgggccttctagaatgtctgattccgctgttg                   |
| 4  | h1bmchlet868r        | cagtcgacgggcccggctgggtaccgggcc                       |
| 5  | f2ar                 | gggccctgggttgactc                                    |
| 6  | h1bf                 | atgtctgattccgctgttttg                                |
| 7  | gfpunir              | ggtacctttgtatagttcatcca                              |
| 8  | p2af                 | gccacgaacttctctctgtt                                 |
| 9  | e2af                 | caatgtactaactacgctttg                                |
| 10 | e2ar                 | aggaccggggttactttca                                  |
| 11 | t2af                 | gagggcagaggaagtctgct                                 |
| 12 | t2ar                 | tgggccaggattctcctcg                                  |
| 13 | p <sup>2</sup> amutf | gaagaaaaccccgccttctagaatgt                           |
| 14 | p <sup>2</sup> amutr | acattctagaaggcggggttttcttc                           |
| 15 | sl2f                 | ggcatggatgaactataactaagctgtctcatcctactttcac          |
| 16 | sl2r                 | caacaacagcggaatcagacatacagcagtttccctgaataaa          |
| 17 | myo3pftfep           | gtaaacgacggccagtgaaattcgatcggctataataagtcttgaataaaa  |
| 18 | myo3ftepr            | ggtaccgagctcgaattcactagtgattctagatggatctagtggtcgtgg  |
| 19 | m13rp                | caggaaacagctatgacc                                   |
| 20 | gfpmiddlef           | gatggaacattcttgacac                                  |
| 21 | let868spe1r          | atacactagtgacgggcccgggatccgat                        |
| 22 | h1bmcherryr          | atccccgcccggctgggtaccgggccct                         |
| 23 | f25b3.3f             | ggctgaaatcactcacaacgatg                              |
| 24 | bld204               | aatthttcatcagatctagtca                               |
| 25 | age1mchepfh          | ccc <u>accgg</u> tatgggtctcaaagggtgaagaag            |
| 26 | age1mchephr          | ctcaccggcttctgcccgtggatccatgg                        |
| 27 | e2aemr-1f            | cgatgttgaaagtaaccccggctctatggacgtctcccagctgacag      |
| 28 | ceremr-1r            | ccagtgaaaaggtcttctcttactcataatagtatcctccggattcgtctcg |
| 29 | cer1-p2ar            | gctttaacagagagaagttcgtggcggatccacgcgtactagtttg       |

---

|    |               |                                                                              |
|----|---------------|------------------------------------------------------------------------------|
| 30 | e2aemr-1f     | cgatgttgaaagtaaccccggtcctatggacgtctcccagctgacag                              |
| 31 | ceremr-1r     | ccagtgaaaaggcttctcctttactcataatagtagtccctccggattcgtctcg                      |
| 32 | sem-4anotf    | agcggccgcaatgaatgagctgctcgcggag                                              |
| 33 | HAnotr        | tgcggccgcagcataatcaggaacatcatacgg                                            |
| 34 | nls-f         | aatgaccgctccaagaagaacgc                                                      |
| 35 | gfp-t2ar      | tgggccaggattctcctcgacgtcaccgcatgtagcagacttctctgcccctttgtatagttcatccatgcatgtg |
| 36 | venus-t2ar    | tgggccaggattctcctcgacgtcaccgcatgtagcagacttctctgcccctttgtacagctcgtccatgcccag  |
| 37 | mcherry-t2ar  | tgggccaggattctcctcgacgtcaccgcatgtagcagacttctctgcccctttgtacagctcgtccatgcccag  |
| 38 | ceh6-nlsf     | ccatctttccacagtagtggccacccggtgctcctggacttccaactgatgaccgctccaagaagaacgc       |
| 39 | ceh6-t2ar     | tgctgaagcagataaagaagacggatggatgacgacgaaggatgagcattgggccaggattctcctcgac       |
| 40 | his72T2AFus1  | cctgttcgttgcaacaattgat                                                       |
| 41 | his72T2AFus2  | gaaaagttcttctctttactcattgttcttggaattgagaattg                                 |
| 42 | his72T2AFus3  | ttccagaacaacaatgagtaaaggagaagaactttcac                                       |
| 43 | his72T2AFus5  | gcaatgctttttataatgccaac                                                      |
| 44 | his72T2AFus6  | gagaattggtgatggagcttactacttatacaattcatccatgccacc                             |
| 45 | his72T2AFus7  | gaattgtataagtagtaagctccatcaccaattctcgaag                                     |
| 46 | his72T2AFus9  | gcaaacgttatagtgtggacacc                                                      |
| 47 | his72T2AFus10 | cacgcaacgcgccgtaaacctac                                                      |

---
