# Supplementary material
Source: PubMed Central journal article supplement (PMC3948794)
Supplement: 610da79bc038ef62c1e6f75e78e5c500_genetics.113.160846-1.pdf [file 610da79bc038ef62c1e6f75e78e5c500_genetics.113.160846-1.pdf]

a-

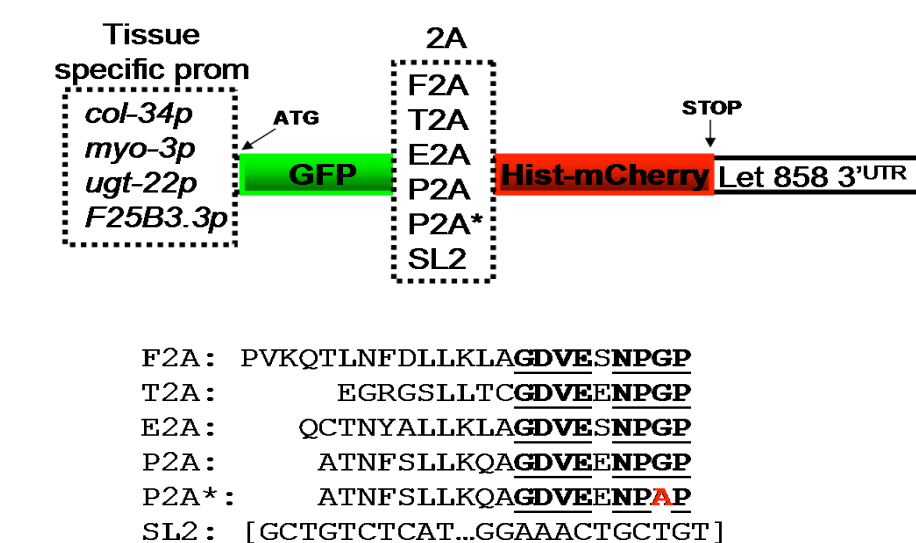

b-

| 2a sequence    | correct localization | 2 markers in the nucleus | 2 markers in the whole cell | GFP only expressed | mCherry only expressed |
|----------------|----------------------|--------------------------|-----------------------------|--------------------|------------------------|
| F2A (n=104)    | 98,15%±1,66%         | 0%±0%                    | 1,08%±1,86%                 | 0%±0%              | 0,78%±1,34%            |
| T2A (n=115)    | 96,86%±2,73%         | 0%±0%                    | 0%±0%                       | 1,63%±2,82%        | 1,52%±2,62%            |
| E2A (n=120)    | 94,35%±8,28%         | 0%±0%                    | 0%±0%                       | 0%±0%              | 5,65%±8,28%            |
| P2A (n= n=144) | 88,11%±3,05%         | 9,62%±4,29%              | 2,27%±2,71%                 | 0%±0%              | 0%±0%                  |
| P2A* (n=96)    | 4,30%±7,45%          | 94,62%±9,31%             | 1,08%±1,86%                 | 0%±0%              | 0%±0%                  |
| SL2 (n=150)    | 95,31%±1,92%         | 0%±0%                    | 0%±0%                       | 0,98%±1,70%        | 3,71%±1,75%            |

**Figure S1** a- Schematic representation of the constructs generated to test the canonical 2A (F2A, T2A, E2A and P2A) peptides in *C. elegans*. P2A\* (Hahn and Palmenberg 1996) was used as a negative control and SL2 (Macosko *et al.* 2009; Kagias *et al.* 2012) was used as a positive control. b- Quantification of the number of cells exhibiting a given sub-cellular localization pattern for the GFP and HISTONE::mCherry proteins in transgenic lines expressing each of the 4 canonical 2A sequences ("correct localization", GFP in the whole cell, HISTONE::mCherry in the nucleus). The very high % of cells exhibiting the expected localization pattern suggests a remarkable efficiency in *C. elegans*. In addition, note that the "self-cleavage" efficiency is not correlated with the length of the 2A peptide used. Although still very robust, we found the peptide P2A to be slightly less efficient in generating two distinct sub-cellular localizations for GFP and mCherry compared to the other 2A peptides; this however may not be due to a lesser production of 2 independent polypeptides (see Supp Fig. 2A and the western blots in Fig. 1). As expected, the "cleavage-inefficient" P2A\* variant leads to the colocalization of the two fluorescent proteins in the nucleus. n= total number of cells scored.

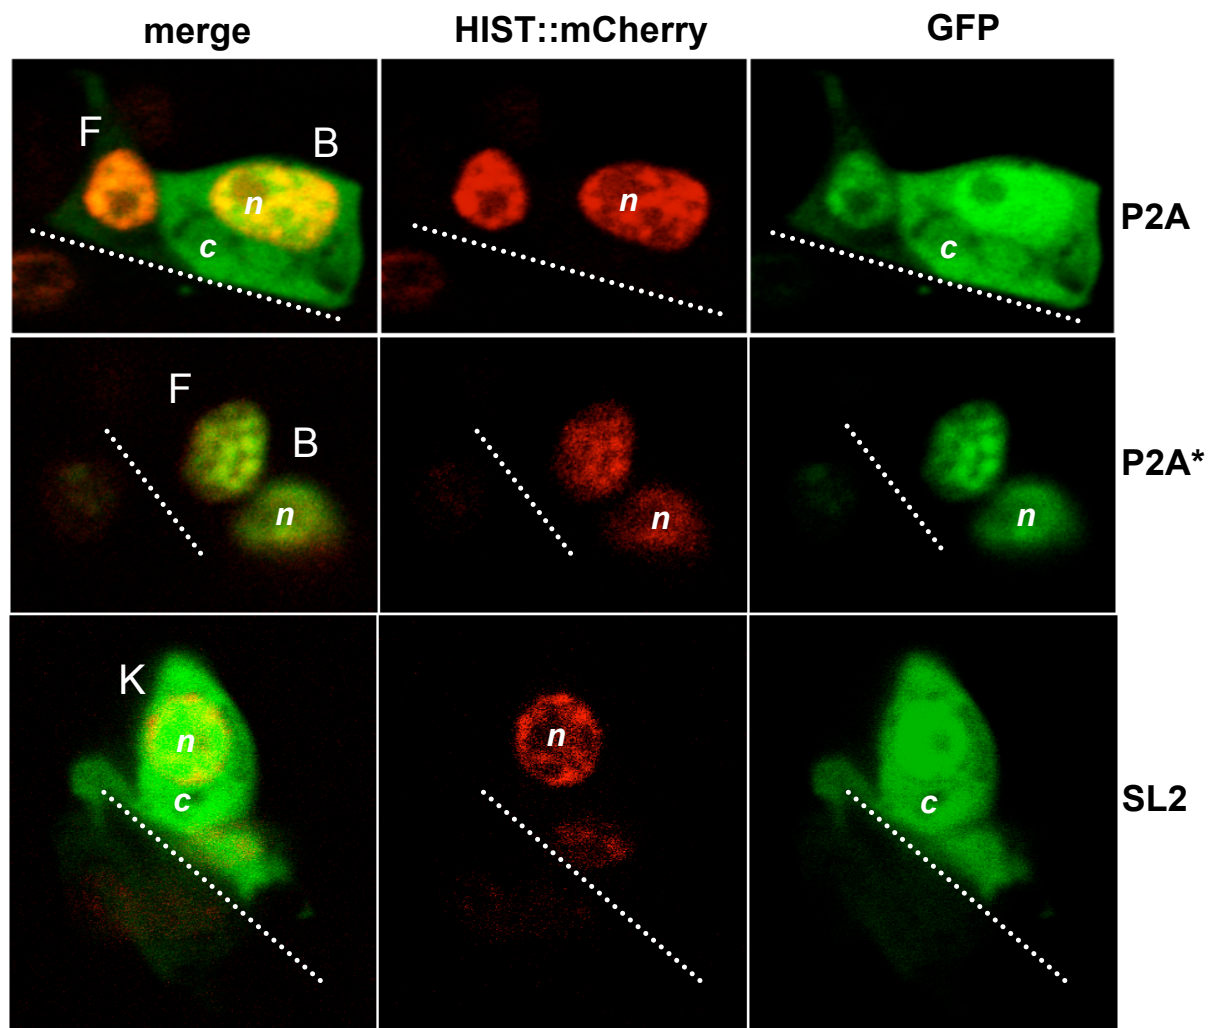

**Figure S2** Differential co-localization of both fluorescent proteins, GFP and HISTONE::mCherry, expressed from the P2A vector described in Fig. S1 (with *col-34p*), is confirmed by confocal SP2 microscopy in the B, F and K rectal cells. We noted that the P2A sequence (top panels) appeared to result in slightly more GFP in the nucleus compared to the other 2A peptides instead of being uniformly spread within the whole cell. Confocal imaging shows here that some of the nuclear GFP does not co-localize with mCherry in the nucleus, suggesting that GFP products that have been split from mCherry can be retained in the nucleus. The same observations were made in transgenic lines expressing a SL2 construct (bottom panels), where substantial GFP is found in the nucleus, in a pattern that distinct from HISTONE::mCherry. Middle panels: split-up-inactive P2A\* peptide (Hahn and Palmenberg 1996). Both fluorescent proteins are exclusively co-localized in the nucleus, as expected if they form one long polypeptide. The dashed line indicates the position of the rectum; anterior is to the left and ventral to the bottom; (n), nucleus and (c) cytosol; the rectal cells are named on the merge panel.

| Developmental stage | bean to 2-folds stage | L1                   | L4              |
|---------------------|-----------------------|----------------------|-----------------|
| <b>E2A</b>          | 95,62%±9,42% (n=186)  | 99,61%±0,88% (n=251) | 100%±0% (n=131) |
| <b>P2A*</b>         | 0%±0% (n=327)*        | 0%±0% (n=200)        | 0%±0% (n=150)   |
| <b>SL2</b>          | 97,34%±5,13% (n=177)  | 100%±0% (n=150)      | 100%±0% (n=117) |

\* note that for ±27,5% of observed cases mCherry is barely visible; however GFP remains strictly restricted to the nucleus meaning that GFP remains fused to HIST-mCherry.

**Figure S3** Quantification of the expected localization pattern (GFP in the whole cell, HISTONE::mCherry in the nucleus) observed for lines expressing *myo-3p::GFP::E2A::Histone::mCherry*, *myo-3p::GFP::P2A\*::Histone::mCherry* or *myo-3p::GFP::SL2::Histone::mCherry* at different developmental stages (see also Fig. 2A); n= total number of cells scored.

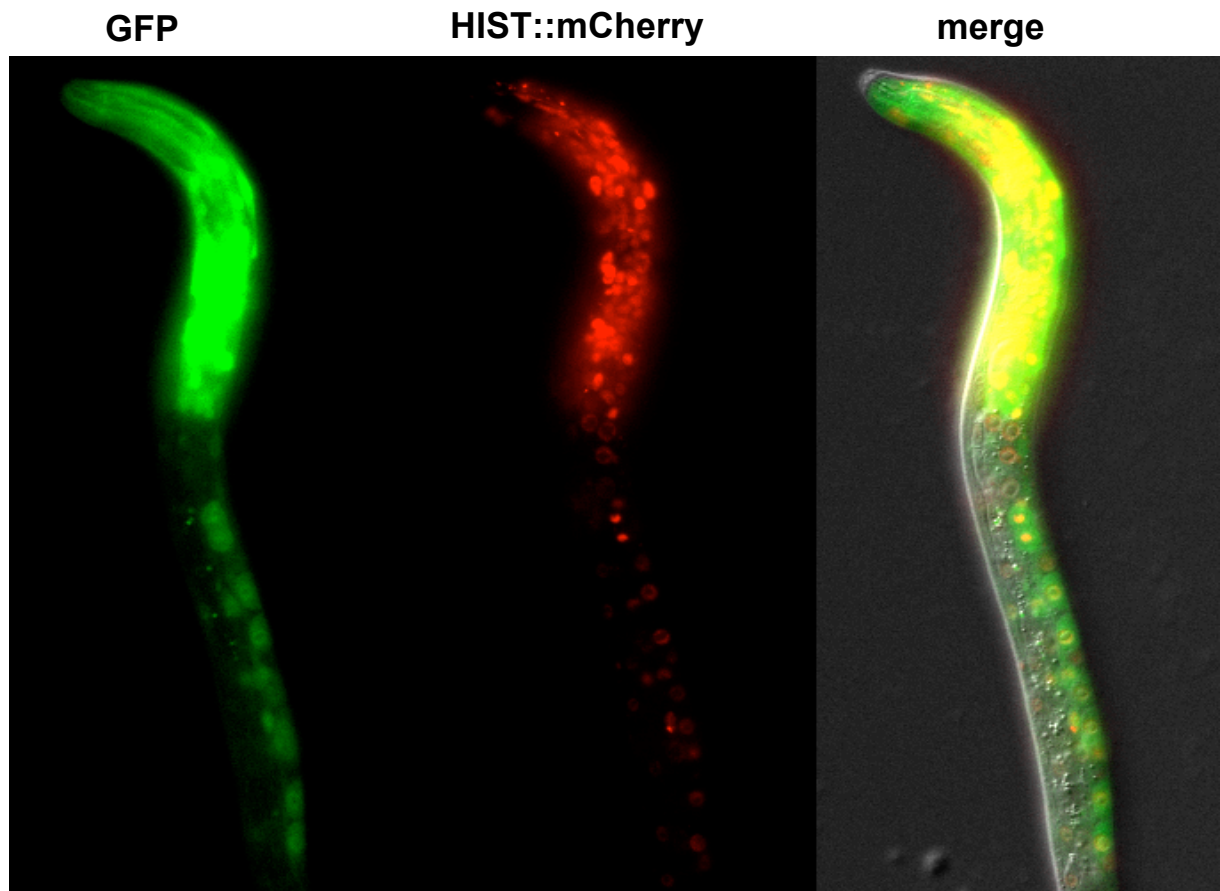

**Figure S4** The expected localization of GFP and mCherry is observed in all cells analyzed in transgenic animals ubiquitously expressing a *his-72p::GFP::F2A::Histone::mCherry* construct. GFP localizes within the whole cell whereas HISTONE::mCherry remains tightly restricted to the nucleus. An L1 worm, vertically oriented and tail at the bottom, is shown.

a-

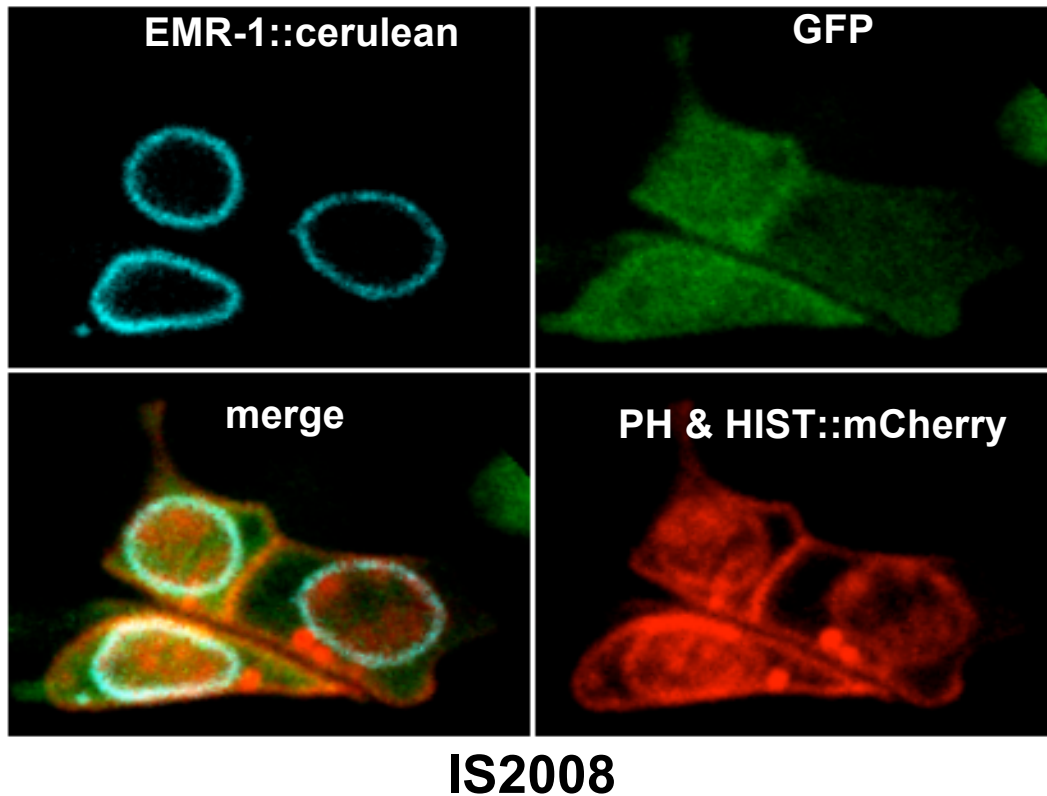

b-

| line/localization | GFP in the whole cell | mCherry::PH at the cell membrane | EMR-1::cerulean at the nuclear membrane | HISTONE::mCherry in the nucleus |
|-------------------|-----------------------|----------------------------------|-----------------------------------------|---------------------------------|
| IS2008 (n=267)    | 100%±0%               | 100%±0%                          | 99,26%±1,28%                            | 96,69% ±0,36%                   |
| IS2070 (n=207)    | 100%±0%               | 100%±0%                          | 100%±0%                                 | 99,04% ±0,83%                   |

**Figure S5 a-** Additional line IS2008 expressing 5 different functional products in the Y, B and F rectal cells. All the markers are addressed to the expected cellular compartments: whole cell (GFP), nucleus and plasma membrane (mCherry) and nuclear envelope (cerulean). In addition, note that the rescuing efficiencies obtained with this line or IS2070 are similar or higher to those obtained with *col-34p::sem-4a::HA::SL2::mCherry* [17,25%±2,49%; n=192 (IS1648) and 12,05%±2,5%; n=126 (IS1649)](Kagias *et al.* 2012). Anterior is to the left and ventral to the bottom. **b-** Quantification of the expected localization for each of the fluorescent protein, in the two transgenic lines IS2008 and IS2070; n= total number of cells scored.

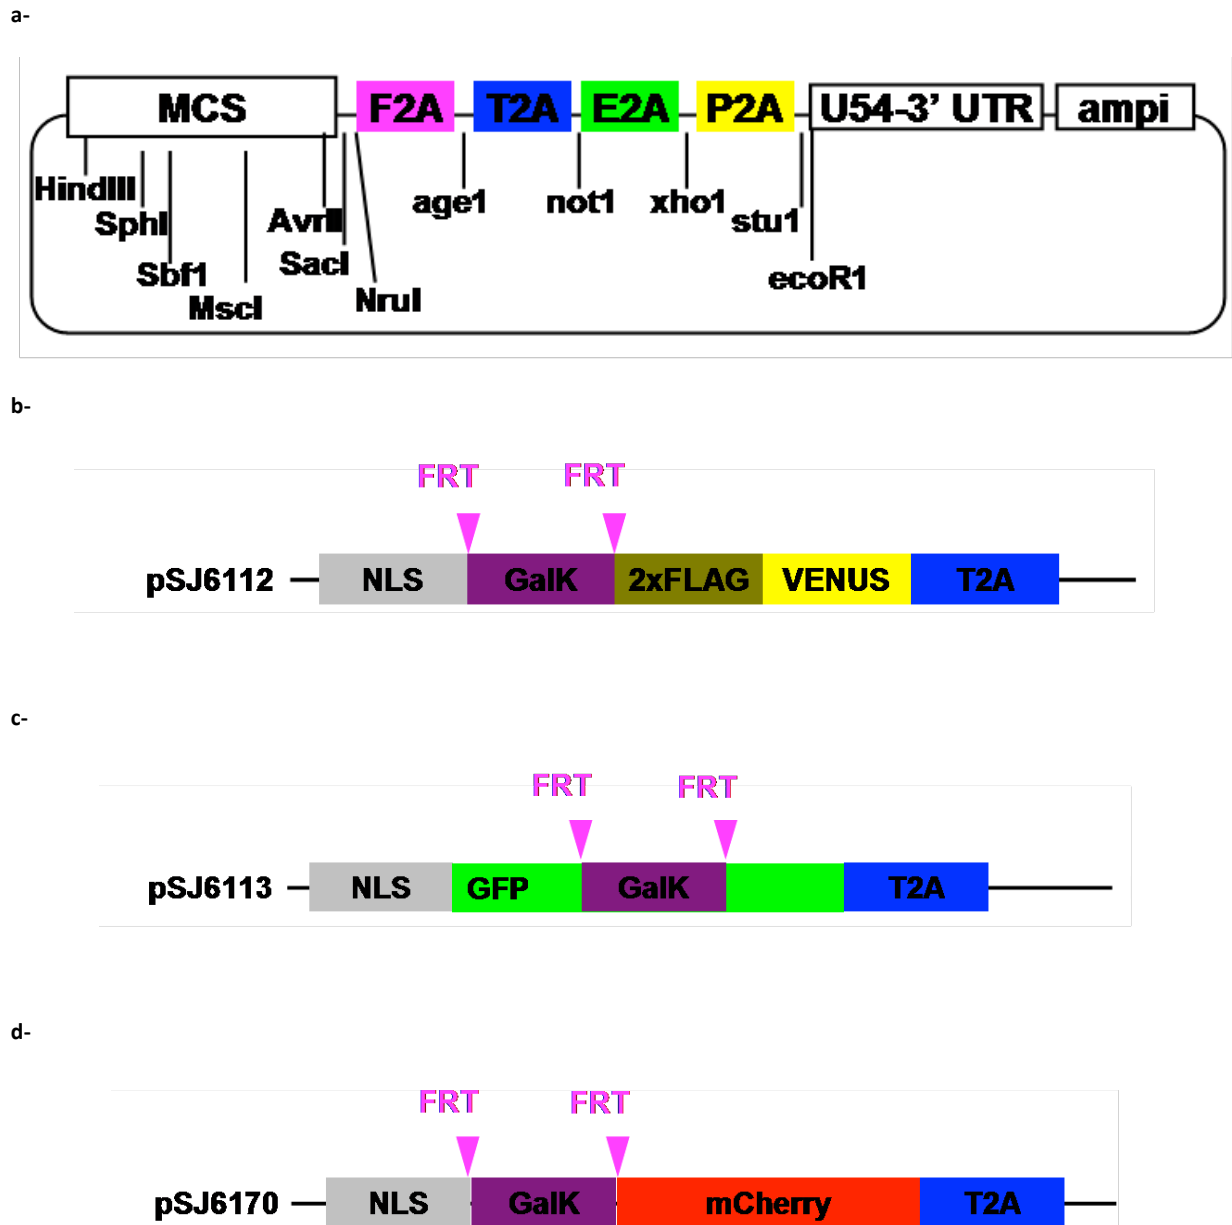

**Figure S6** 2A TOOLKIT for *C. elegans*. a- Map of pSJ6186 [*MCS::F2A::T2A::E2A::P2A::U543' UTR*]. b- Map of pSJ6112 [*NLS::FRT::galK::FRT::2xFLAG::VENUS::T2A*] [Modified from (Tursun *et al.* 2009)]. c- Map of pSJ6113 [*NLS::GFP(part1)::FRT::galK::FRT::GFP(part2)::T2A*] [Modified from (Tursun *et al.* 2009)]. d- Map of pSJ6170 [*NLS::FRT::galK::FRT::mCherry::T2A*] [Modified from (Tursun *et al.* 2009)]. (Sequences available on demand).

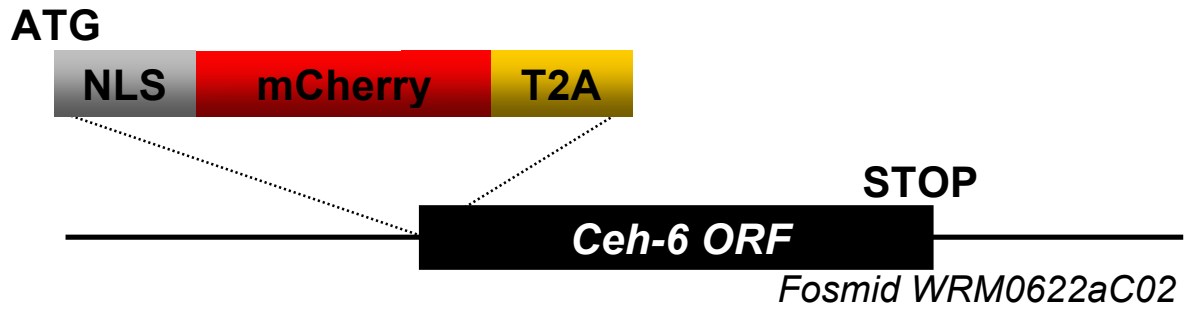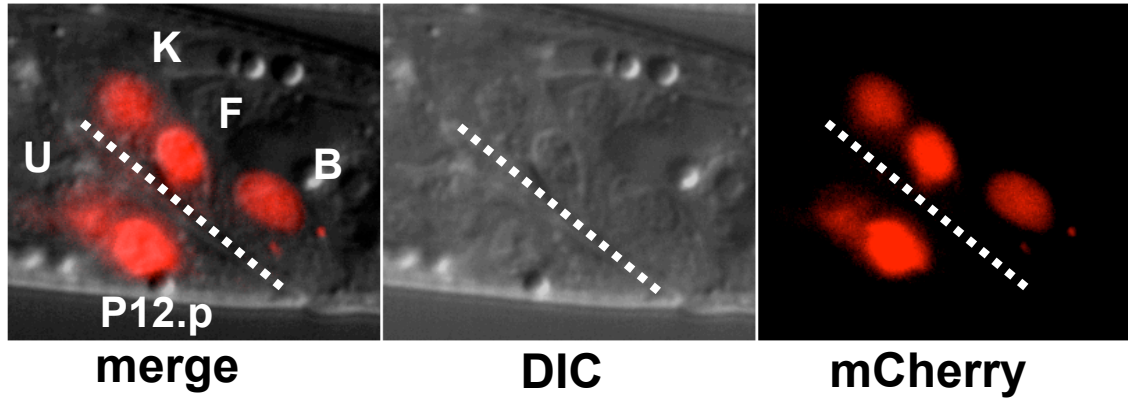

**Figure S7** Schematic representation of the 2A-modified fosmid *WRM0622aC02* encompassing the *ceh-6* genomic locus and the expression it drives in rectal cells (shown are the B, P12.pa, U, F and K rectal cells) and that mimics the expression pattern observed after antibody staining for CEH-6 (Burglin and Ruvkun 2001). Anterior is to the left and ventral to the bottom.

**Table S1 List of the molecular constructs generated for this study**

| Name    | R.    | Backbone              | Plasmid description                                                                                                                     |
|---------|-------|-----------------------|-----------------------------------------------------------------------------------------------------------------------------------------|
| pSJ6171 | Ampi  | pUC57                 | <i>Col-34p ::GFP ::F2A ::Hist-24 ::mCherry ::let 858 3' UTR</i>                                                                         |
| pSJ6172 | Ampi  | pUC57                 | <i>Col-34p ::GFP ::T2A ::Hist-24 ::mCherry ::let 858 3' UTR</i>                                                                         |
| pSJ6173 | Ampi  | pUC57                 | <i>Col-34p ::GFP ::E2A ::Hist-24 ::mCherry ::let 858 3' UTR</i>                                                                         |
| pSJ6174 | Ampi  | pUC57                 | <i>Col-34p ::GFP ::P2A ::Hist-24 ::mCherry ::let 858 3' UTR</i>                                                                         |
| pSJ6175 | Ampi  | pUC57                 | <i>Col-34p ::GFP ::P2A* ::Hist-24 ::mCherry ::let 858 3' UTR</i>                                                                        |
| pSJ6176 | Ampi  | pUC57                 | <i>Col-34p ::GFP ::SL2 ::Hist-24 ::mCherry ::let 858 3' UTR</i>                                                                         |
| pSJ6177 | Ampi  | pUC57                 | <i>Myo-3p ::GFP ::F2A ::Hist-24 ::mCherry ::let 858 3' UTR</i>                                                                          |
| pSJ6178 | Ampi  | pUC57                 | <i>Myo-3p ::GFP ::T2A ::Hist-24 ::mCherry ::let 858 3' UTR</i>                                                                          |
| pSJ6179 | Ampi  | pUC57                 | <i>Myo-3p ::GFP ::E2A ::Hist-24 ::mCherry ::let 858 3' UTR</i>                                                                          |
| pSJ6180 | Ampi  | pUC57                 | <i>Myo-3p ::GFP ::P2A ::Hist-24 ::mCherry ::let 858 3' UTR</i>                                                                          |
| pSJ6181 | Ampi  | pUC57                 | <i>Myo-3p ::GFP ::P*2A ::Hist-24 ::mCherry ::let 858 3' UTR</i>                                                                         |
| pSJ6182 | Ampi  | pUC57                 | <i>Myo-3p ::GFP ::SL2 ::Hist-24 ::mCherry ::let 858 3' UTR</i>                                                                          |
| pSJ6183 | Ampi  | pjet1.2™              | <i>F25B3.3p ::GFP :: T2A ::Hist-24 ::mCherry ::let 858 3' UTR</i>                                                                       |
| pSJ6187 | Ampi  | pjet1.2™              | <i>Ugt-22p ::GFP :: T2A ::Hist-24 ::mCherry ::let 858 3' UTR</i>                                                                        |
| pSJ6188 | Ampi  | Strataclone™<br>Kana  | <i>His-72p ::GFP :: F2A ::Hist-24 ::mCherry ::his-72 3' UTR</i>                                                                         |
| pSJ6184 | Ampi  | pUC57                 | <i>Col-34p ::GFP ::F2A ::mCherry ::PH ::T2A ::sem-4a<sup>HA</sup> ::E2A ::emr-1 ::cerulean::P2A::Hist-24 ::mCherry ::let 858 3' UTR</i> |
| pSJ6185 | ChloR | WRM0622aC02<br>fosmid | <i>NLS ::mCherry ::T2A ::ceh-6 gene</i>                                                                                                 |
| pSJ6112 | Ampi  | TOPO pcrII™<br>Kana   | <i>NLS ::FRT ::galK ::FRT ::2xFLAG ::VENUS ::T2A [TOPO pcrII – Invitrogen®]</i>                                                         |
| pSJ6113 | Ampi  | TOPO pcrII™<br>Kana   | <i>NLS ::GFP(part1) ::FRT ::galK ::FRT ::GFP(part2) ::T2A [TOPO pcrII – Invitrogen®]</i>                                                |
| pSJ6170 | Ampi  | TOPO pcrII™<br>Kana   | <i>NLS ::FRT ::galK ::FRT ::mCherry ::T2A [TOPO pcrII – Invitrogen®]</i>                                                                |
| pSJ6186 | Ampi  | pPD95.75              | <i>MCS ::F2A ::T2A ::E2A ::P2A ::U543' UTR</i>                                                                                          |



**Table S2 List of primers used for this study**

| N° | name                 | sequence                                             |
|----|----------------------|------------------------------------------------------|
| 1  | acc65i gfpf          | aacggtaccagaaaaaatgagtaaaggagaag                     |
| 2  | acc65i gfpr          | ttgggtacctttgtatagttcatccatgcc                       |
| 3  | h1bmchlet868f        | cccgggccttctagaatgtctgattccgctgttg                   |
| 4  | h1bmchlet868r        | cagtcgacgggcccggctgggtaccgggcc                       |
| 5  | f2ar                 | gggccctgggttgactc                                    |
| 6  | h1bf                 | atgtctgattccgctgttttg                                |
| 7  | gfpunir              | ggtacctttgtatagttcatcca                              |
| 8  | p2af                 | gccacgaacttctctctgtt                                 |
| 9  | e2af                 | caatgtactaactacgctttg                                |
| 10 | e2ar                 | aggaccggggttactttca                                  |
| 11 | t2af                 | gagggcagaggaagtctgct                                 |
| 12 | t2ar                 | tgggccaggattctcctcg                                  |
| 13 | p <sup>2</sup> amutf | gaagaaaaccccgccttctagaatgt                           |
| 14 | p <sup>2</sup> amutr | acattctagaaggcggggttttcttc                           |
| 15 | sl2f                 | ggcatggatgaactataactaagctgtctcatcctactttcac          |
| 16 | sl2r                 | caacaacagcggaatcagacatacagcagtttccctgaataaa          |
| 17 | myo3pftpef           | gtaaaacgacggccagtgaaattcgatcggtataataagtcttgaataaaa  |
| 18 | myo3ftepr            | ggtaccgagctcgaattcactagtgattctagatggatctagtggtcgtgg  |
| 19 | m13rp                | caggaaacagctatgacc                                   |
| 20 | gfpmiddlef           | gatggaacattcttgacac                                  |
| 21 | let868spe1r          | atacactagtgacgggcccgggatccgat                        |
| 22 | h1bmcherryr          | atccccgctggctgggtaccgggccct                          |
| 23 | f25b3.3f             | ggctgaaatcactcacaacgatg                              |
| 24 | bld204               | aatthttcatcagatctagtca                               |
| 25 | age1mchephf          | ccc <u>ccgg</u> tatggtctcaaagggtgaagaag              |
| 26 | age1mchephr          | ctcaccggtcttctgcccgtggatccatgg                       |
| 27 | e2aemr-1f            | cgatgttgaaagtaaccccggctctatggacgtctcccagctgacag      |
| 28 | ceremr-1r            | ccagtgaaaaggtcttctcttactcataatagatctcctccgattcgtctcg |
| 29 | cer1-p2ar            | gctttaacagagagaagttcgtggcggatccacgcgtactagtttg       |

---

|    |               |                                                                             |
|----|---------------|-----------------------------------------------------------------------------|
| 30 | e2aemr-1f     | cgatgttgaaagtaaccccggtcctatggacgtctccagctgacag                              |
| 31 | ceremr-1r     | ccagtgaaaaggctctctcttactcataatagtagtcccggtctgctcg                           |
| 32 | sem-4anotf    | agcggccgcaatgaatgagctgctgcccag                                              |
| 33 | HAnotr        | tgcggccgcagcataatcaggaacatcatacgg                                           |
| 34 | nls-f         | aatgaccgctcaaagaagaacgc                                                     |
| 35 | gfp-t2ar      | tgggccaggattctctcgacgtcaccgcatgtagcagacttctctgcccctttgtatagttcatccatgcatgtg |
| 36 | venus-t2ar    | tgggccaggattctctcgacgtcaccgcatgtagcagacttctctgcccctttgtacagctcgtccatgccgag  |
| 37 | mcherry-t2ar  | tgggccaggattctctcgacgtcaccgcatgtagcagacttctctgcccctttgtacagctcgtccatgccgcc  |
| 38 | ceh6-nlsf     | ccatctttccacagtagtggccacccggtgctctggacttccaactgatgaccgctcaaagaagaacgc       |
| 39 | ceh6-t2ar     | tgctgaagcagataaagaagacggtatggatgacgacgaaggtatgagcattgggccaggattctctcgac     |
| 40 | his72T2AFus1  | cctgttcgttgcaacaattgat                                                      |
| 41 | his72T2AFus2  | gaaaagttctctcttactcattgttcttggaattgagaattg                                  |
| 42 | his72T2AFus3  | ttccagaacaacaatgagtaaaggagaagaactttcac                                      |
| 43 | his72T2AFus5  | gcaatgctttttataatgccaac                                                     |
| 44 | his72T2AFus6  | gagaattggtgatggagcttactacttatacaattcatccatgccacc                            |
| 45 | his72T2AFus7  | gaattgtataagtagtaagctccatcaccaattctcgaag                                    |
| 46 | his72T2AFus9  | gcaaacgttatagtgtggacacc                                                     |
| 47 | his72T2AFus10 | cacgcaacgcgccgtaaacctac                                                     |

---

**Table S3 List of strains/array generated for this study**

|             | <i>col-34 promoter</i> | <i>myo-3 promoter</i>     | <i>ugt-22 promoter</i>    | <i>F25b3. 3 promoter</i> |
|-------------|------------------------|---------------------------|---------------------------|--------------------------|
| <b>SL2</b>  | IS1942 fpEx558         | IS2041 fpEx628 <i>W.B</i> |                           |                          |
|             | IS1943 fpEx559         | IS2090 fpEx667            |                           |                          |
|             | IS1944 fpEx560         | IS2092 fpEx669            |                           |                          |
| <b>F2A</b>  | IS1946 fpEx562         | IS2003 fpEx600 <i>W.B</i> |                           |                          |
|             | IS1947 fpEx563         | IS2077 fpEx658            |                           |                          |
|             | IS1948 fpEx564         | S2091 fpEx668             |                           |                          |
| <b>T2A</b>  | IS1949 fpEx565         | IS2071 fpEx653            | IS1980 fpEx584 <i>W.B</i> | IS1982 fpEx585           |
|             | IS1950 fpEx566         | IS2073 fpEx654 <i>W.B</i> | IS2075 fpEx656            | IS2068 fpEx650           |
|             | IS1951 fpEx567         | IS2074 fpEx655            | IS2076 fpEx657            | IS2069 fpEx651           |
|             |                        | IS2078 fpEx659            |                           |                          |
| <b>E2A</b>  | IS1952 fpEx568         | IS2004 fpEx601 <i>W.B</i> |                           |                          |
|             | IS1953 fpEx569         | IS2058 fpEx640            |                           |                          |
|             | IS1954 fpEx570         | IS2059 fpEx641            |                           |                          |
|             | IS1955 fpEx571         |                           |                           |                          |
| <b>P2A</b>  | IS1945 fpEx561         | IS2031 fpEx619            |                           |                          |
|             | IS2005 fpEx602         | IS2053 fpEx635 <i>W.B</i> |                           |                          |
|             | IS2006 fpEx603         | IS2060 fpEx642            |                           |                          |
|             |                        | IS2064 fpEx646            |                           |                          |
|             |                        | IS2066 fpEx648            |                           |                          |
| <b>P2A*</b> | IS2061 fpEx64 <i>d</i> | IS2028 fpEx617 <i>W.B</i> |                           |                          |
|             | IS2062 fpEx644         | IS2029 fpEx618            |                           |                          |
|             | IS2065 fpEx647         |                           |                           |                          |

W.B: strain used for Western-Blot analysis

**Strains obtained by injecting pSJ6184 :**

IS2008 fpEx605

IS2070 fpEx252

**Strain obtained by injecting pSJ6185 :**

IS2067 fpEx649

**Strain obtained by injecting pSJ6188 :**

IS2279 fpEx791

## Acknowledgements

We thank P. Meister, O. Hobert, S. Kim, C. Bargmann and P. Sengupta for kindly providing DNA constructs. We thank D. Moerman for kindly providing fosmid reagents from the *C. elegans* Fosmid Library\*.

\* Jaryn Perkins<sup>1,2</sup>, Kim Wong<sup>3</sup>, René Warren<sup>3</sup>, Jacquie Schein<sup>3</sup>, Jeff Stott<sup>3</sup>, Rob Holt<sup>3</sup>, Steve Jones<sup>3</sup>, Marco Marra<sup>3</sup>, and Don Moerman<sup>1,2</sup>

<sup>1</sup>Michael Smith Laboratories, U.B.C., Vancouver, B.C., Canada V6T 1Z4

<sup>2</sup>Department of Zoology, University of British Columbia, B.C. Vancouver, Canada V6T 1Z4

<sup>3</sup>Genome Sciences Centre, BC Cancer Agency, Vancouver, B.C. Canada, V5Z 4S6

## Additional references:

Burglin, T. R., and G. Ruvkun, 2001 Regulation of ectodermal and excretory function by the *C. elegans* POU homeobox gene *ceh-6*. *Development* 128: 779-790.

Hahn, H., and A. C. Palmenberg, 1996 Mutational analysis of the encephalomyocarditis virus primary cleavage. *J Virol* 70: 6870-6875.

Kagias, K., A. Ahier, N. Fischer and S. Jarriault, 2012 Members of the NOD2 (Nanog and Oct4-associated deacetylase) complex and SOX-2 promote the initiation of a natural cellular reprogramming event in vivo. *Proc Natl Acad Sci U S A* 109: 6596-6601.

Macosko, E. Z., N. Pokala, E. H. Feinberg, S. H. Chalasani, R. A. Butcher *et al.*, 2009 A hub-and-spoke circuit drives pheromone attraction and social behaviour in *C. elegans*. *Nature* 458: 1171-1175.

Tursun, B., L. Cochella, I. Carrera and O. Hobert, 2009 A toolkit and robust pipeline for the generation of fosmid-based reporter genes in *C. elegans*. *PLoS One* 4: e4625.
