# Supplementary material
Source: PubMed Central journal article supplement (PMC3948794)
Supplement: 580079f883ab88dc7d77ef8cd95199de_genetics.113.160846-11.pdf [file 580079f883ab88dc7d77ef8cd95199de_genetics.113.160846-11.pdf]

**Table S1 List of the molecular constructs generated for this study**

| Name    | R.    | Backbone              | Plasmid description                                                                                                                     |
|---------|-------|-----------------------|-----------------------------------------------------------------------------------------------------------------------------------------|
| pSJ6171 | Ampi  | pUC57                 | <i>Col-34p ::GFP ::F2A ::Hist-24 ::mCherry ::let 858 3' UTR</i>                                                                         |
| pSJ6172 | Ampi  | pUC57                 | <i>Col-34p ::GFP ::T2A ::Hist-24 ::mCherry ::let 858 3' UTR</i>                                                                         |
| pSJ6173 | Ampi  | pUC57                 | <i>Col-34p ::GFP ::E2A ::Hist-24 ::mCherry ::let 858 3' UTR</i>                                                                         |
| pSJ6174 | Ampi  | pUC57                 | <i>Col-34p ::GFP ::P2A ::Hist-24 ::mCherry ::let 858 3' UTR</i>                                                                         |
| pSJ6175 | Ampi  | pUC57                 | <i>Col-34p ::GFP ::P2A* ::Hist-24 ::mCherry ::let 858 3' UTR</i>                                                                        |
| pSJ6176 | Ampi  | pUC57                 | <i>Col-34p ::GFP ::SL2 ::Hist-24 ::mCherry ::let 858 3' UTR</i>                                                                         |
| pSJ6177 | Ampi  | pUC57                 | <i>Myo-3p ::GFP ::F2A ::Hist-24 ::mCherry ::let 858 3' UTR</i>                                                                          |
| pSJ6178 | Ampi  | pUC57                 | <i>Myo-3p ::GFP ::T2A ::Hist-24 ::mCherry ::let 858 3' UTR</i>                                                                          |
| pSJ6179 | Ampi  | pUC57                 | <i>Myo-3p ::GFP ::E2A ::Hist-24 ::mCherry ::let 858 3' UTR</i>                                                                          |
| pSJ6180 | Ampi  | pUC57                 | <i>Myo-3p ::GFP ::P2A ::Hist-24 ::mCherry ::let 858 3' UTR</i>                                                                          |
| pSJ6181 | Ampi  | pUC57                 | <i>Myo-3p ::GFP ::P*2A ::Hist-24 ::mCherry ::let 858 3' UTR</i>                                                                         |
| pSJ6182 | Ampi  | pUC57                 | <i>Myo-3p ::GFP ::SL2 ::Hist-24 ::mCherry ::let 858 3' UTR</i>                                                                          |
| pSJ6183 | Ampi  | pjet1.2™              | <i>F25B3.3p ::GFP :: T2A ::Hist-24 ::mCherry ::let 858 3' UTR</i>                                                                       |
| pSJ6187 | Ampi  | pjet1.2™              | <i>Ugt-22p ::GFP :: T2A ::Hist-24 ::mCherry ::let 858 3' UTR</i>                                                                        |
| pSJ6188 | Ampi  | Strataclone™<br>Kana  | <i>His-72p ::GFP :: F2A ::Hist-24 ::mCherry ::his-72 3' UTR</i>                                                                         |
| pSJ6184 | Ampi  | pUC57                 | <i>Col-34p ::GFP ::F2A ::mCherry ::PH ::T2A ::sem-4a<sup>HA</sup> ::E2A ::emr-1 ::cerulean::P2A::Hist-24 ::mCherry ::let 858 3' UTR</i> |
| pSJ6185 | ChloR | WRM0622aC02<br>fosmid | <i>NLS ::mCherry ::T2A ::ceh-6 gene</i>                                                                                                 |
| pSJ6112 | Ampi  | TOPO pcrII™<br>Kana   | <i>NLS ::FRT ::galK ::FRT ::2xFLAG ::VENUS ::T2A [TOPO pcrII – Invitrogen®]</i>                                                         |
| pSJ6113 | Ampi  | TOPO pcrII™<br>Kana   | <i>NLS ::GFP(part1) ::FRT ::galK ::FRT ::GFP(part2) ::T2A [TOPO pcrII – Invitrogen®]</i>                                                |
| pSJ6170 | Ampi  | TOPO pcrII™<br>Kana   | <i>NLS ::FRT ::galK ::FRT ::mCherry ::T2A [TOPO pcrII – Invitrogen®]</i>                                                                |
| pSJ6186 | Ampi  | pPD95.75              | <i>MCS ::F2A ::T2A ::E2A ::P2A ::U543' UTR</i>                                                                                          |
