# Supplementary material
Source: PubMed Central journal article supplement (PMC3948794)
Supplement: ad4ad1aa51519a36c9b0dee346be2976_genetics.113.160846-2.pdf [file ad4ad1aa51519a36c9b0dee346be2976_genetics.113.160846-2.pdf]

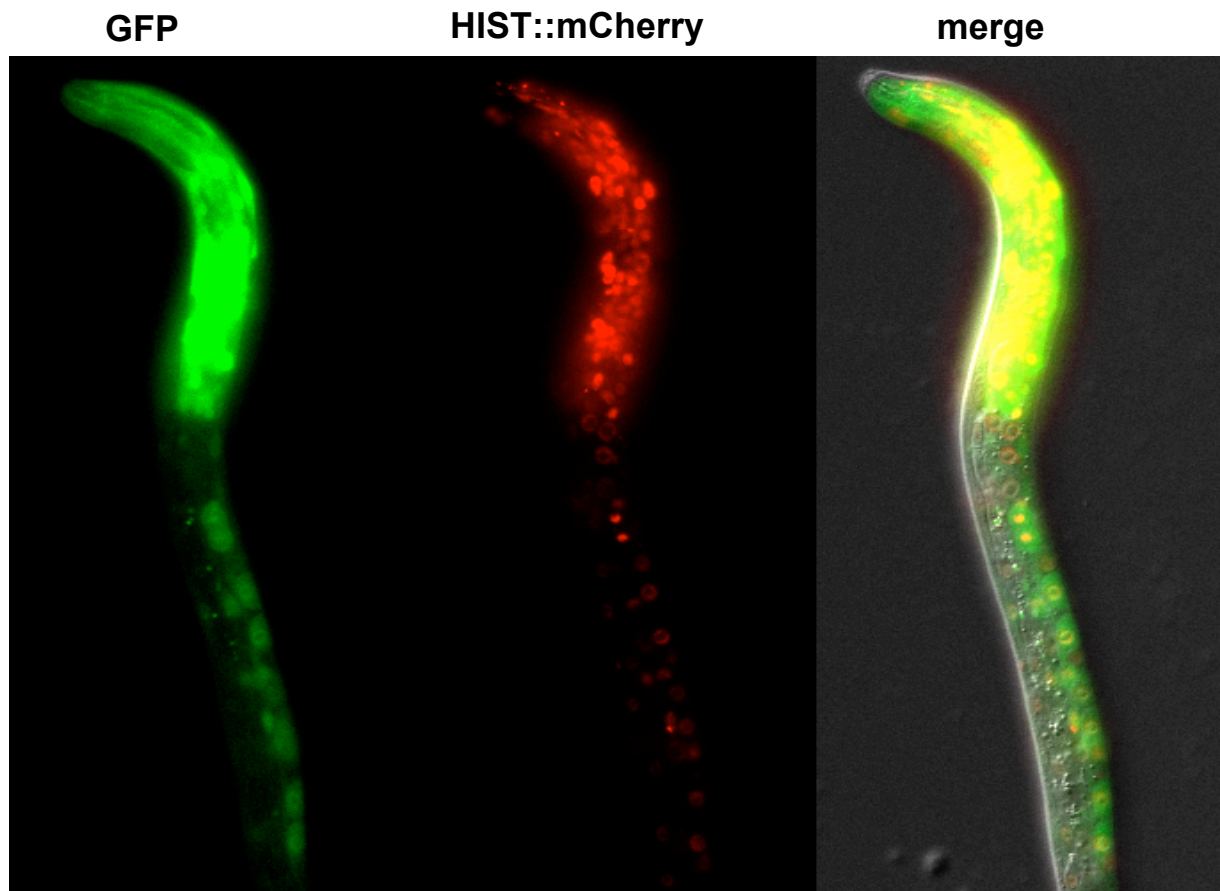

**Figure S4** The expected localization of GFP and mCherry is observed in all cells analyzed in transgenic animals ubiquitously expressing a *his-72p::GFP::F2A::Histone::mCherry* construct. GFP localizes within the whole cell whereas HISTONE::mCherry remains tightly restricted to the nucleus. An L1 worm, vertically oriented and tail at the bottom, is shown.
