# Supplementary material
Source: PubMed Central journal article supplement (PMC3948794)
Supplement: bd959e01682127687a74c685f8b0e035_genetics.113.160846-5.pdf [file bd959e01682127687a74c685f8b0e035_genetics.113.160846-5.pdf]

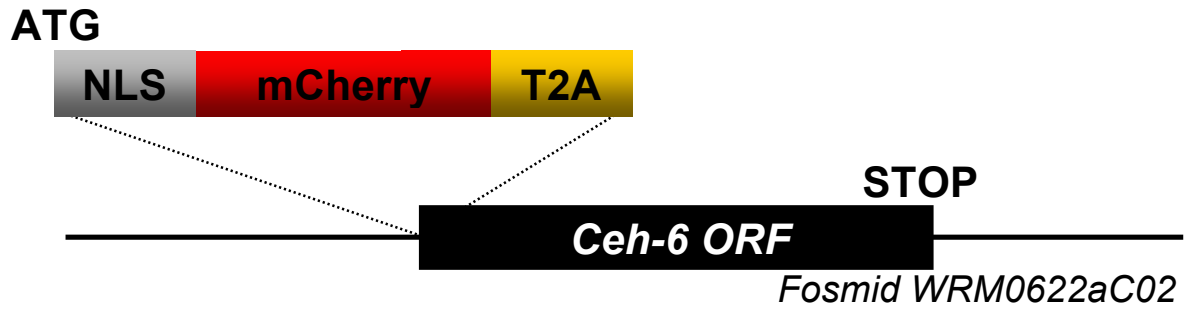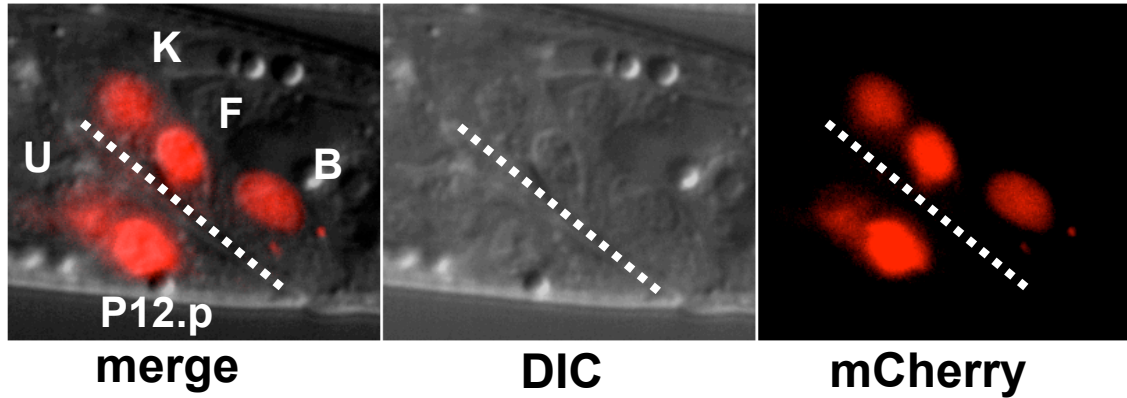

**Figure S7** Schematic representation of the 2A-modified fosmid *WRM0622aC02* encompassing the *ceh-6* genomic locus and the expression it drives in rectal cells (shown are the B, P12.pa, U, F and K rectal cells) and that mimics the expression pattern observed after antibody staining for CEH-6 (Burglin and Ruvkun 2001). Anterior is to the left and ventral to the bottom.
