# Supplementary material
Source: PubMed Central journal article supplement (PMC3948794)
Supplement: bf54fc8bcf15509f99c4a559016d8fd0_genetics.113.160846-8.pdf [file bf54fc8bcf15509f99c4a559016d8fd0_genetics.113.160846-8.pdf]

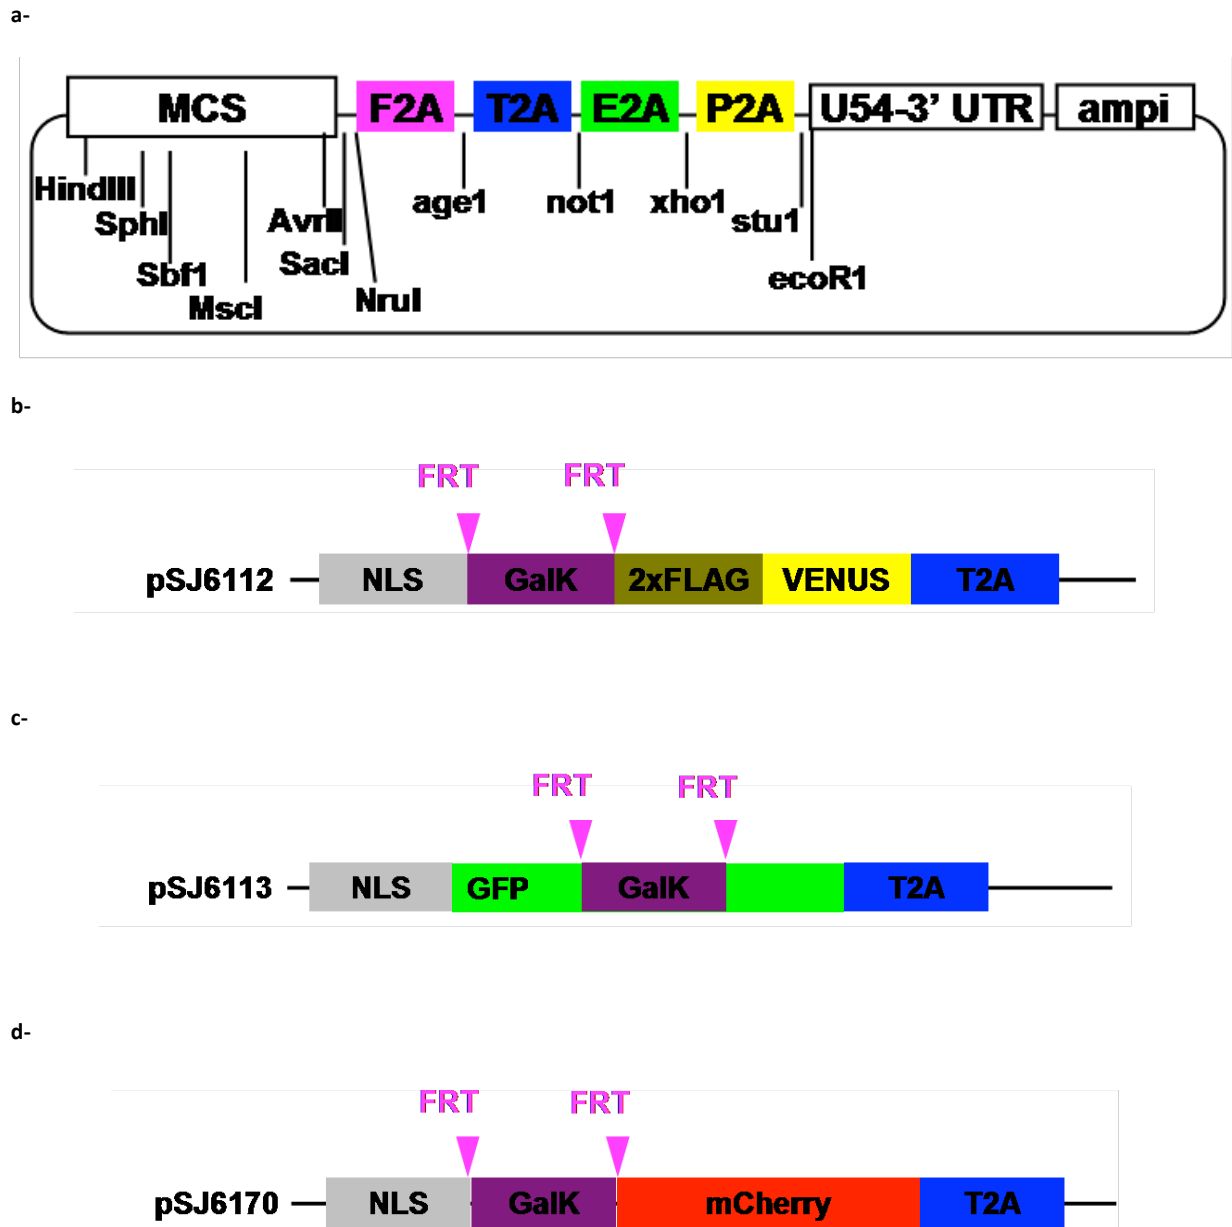

**Figure S6** 2A TOOLKIT for *C. elegans*. a- Map of pSJ6186 [MCS::F2A::T2A::E2A::P2A::U543' UTR]. b- Map of pSJ6112 [NLS::FRT::galK::FRT::2xFLAG::VENUS::T2A] [Modified from (Tursun *et al.* 2009)]. c- Map of pSJ6113 [NLS::GFP(part1)::FRT::galK::FRT::GFP(part2)::T2A] [Modified from (Tursun *et al.* 2009)]. d- Map of pSJ6170 [NLS::FRT::galK::FRT::mCherry::T2A] [Modified from (Tursun *et al.* 2009)]. (Sequences available on demand).
