# Supplementary material
Source: PubMed Central journal article supplement (PMC3948794)
Supplement: ca77ce0f73613cd5821e7cac0a5f67d1_genetics.113.160846-9.pdf [file ca77ce0f73613cd5821e7cac0a5f67d1_genetics.113.160846-9.pdf]

a-

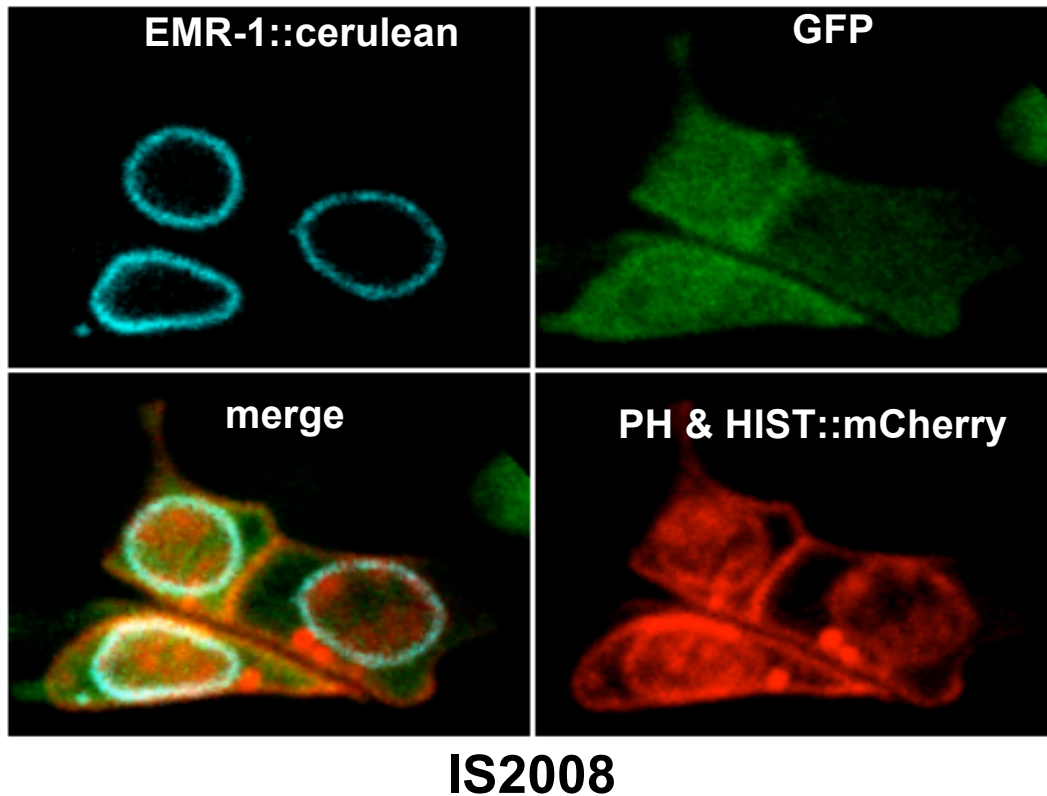

b-

| line/localization     | GFP in the whole cell | mCherry::PH at the cell membrane | EMR-1::cerulean at the nuclear membrane | HISTONE::mCherry in the nucleus |
|-----------------------|-----------------------|----------------------------------|-----------------------------------------|---------------------------------|
| <b>IS2008</b> (n=267) | 100%±0%               | 100%±0%                          | 99,26%±1,28%                            | 96,69% ±0,36%                   |
| <b>IS2070</b> (n=207) | 100%±0%               | 100%±0%                          | 100%±0%                                 | 99,04% ±0,83%                   |

**Figure S5 a-** Additional line IS2008 expressing 5 different functional products in the Y, B and F rectal cells. All the markers are addressed to the expected cellular compartments: whole cell (GFP), nucleus and plasma membrane (mCherry) and nuclear envelope (cerulean). In addition, note that the rescuing efficiencies obtained with this line or IS2070 are similar or higher to those obtained with *col-34p::sem-4a::HA::SL2::mCherry* [17,25%±2,49%; n=192 (IS1648) and 12,05%±2,5%; n=126 (IS1649)](Kagias *et al.* 2012). Anterior is to the left and ventral to the bottom. **b-** Quantification of the expected localization for each of the fluorescent protein, in the two transgenic lines IS2008 and IS2070; n= total number of cells scored.
