# Supplementary material
Source: PubMed Central journal article supplement (PMC3948794)
Supplement: f10cbba8f3dc7115f19e236cbab46a3b_genetics.113.160846-6.pdf [file f10cbba8f3dc7115f19e236cbab46a3b_genetics.113.160846-6.pdf]

| Developmental stage | bean to 2-folds stage | L1                   | L4              |
|---------------------|-----------------------|----------------------|-----------------|
| <b>E2A</b>          | 95,62%±9,42% (n=186)  | 99,61%±0,88% (n=251) | 100%±0% (n=131) |
| <b>P2A*</b>         | 0%±0% (n=327)*        | 0%±0% (n=200)        | 0%±0% (n=150)   |
| <b>SL2</b>          | 97,34%±5,13% (n=177)  | 100%±0% (n=150)      | 100%±0% (n=117) |

\* note that for ±27,5% of observed cases mCherry is barely visible; however GFP remains strictly restricted to the nucleus meaning that GFP remains fused to HIST-mCherry.

**Figure S3** Quantification of the expected localization pattern (GFP in the whole cell, HISTONE::mCherry in the nucleus) observed for lines expressing *myo-3p::GFP::E2A::Histone::mCherry*, *myo-3p::GFP::P2A\*::Histone::mCherry* or *myo-3p::GFP::SL2::Histone::mCherry* at different developmental stages (see also Fig. 2A); n= total number of cells scored.
